# Supplementary material
Source: MDPI journal article supplement (https://www.mdpi.com/2673-4672/4/1/8)
Supplement: s1 [file s1]

Article

# Copper in Commercial Marine Fish: From Biomonitoring to the ESG (Environment, Social, and Governance) Method

Chee Kong Yap<sup>1\*</sup>, Tze Yik Austin Hew<sup>1</sup>, Rosimah Nulit<sup>1</sup>, Wan Mohd Syazwan<sup>1</sup>, Hideo Okamura<sup>2</sup>, Yoshifumi Horie<sup>2</sup>, Meng Chuan Ong<sup>3,4</sup>, Mohamad Saupi Ismail<sup>5</sup>, Krishnan Kumar<sup>6</sup>, and Wan Hee Cheng<sup>6</sup>

<sup>1</sup>Department of Biology, Faculty of Science, Universiti Putra Malaysia, 43400 UPM Serdang, Selangor, Malaysia; [rosimah@upm.edu.my](mailto:rosimah@upm.edu.my) (R.N.); [mhdsyazwan@upm.edu.my](mailto:mhdsyazwan@upm.edu.my) (W.M.S.);

<sup>2</sup>Graduate School of Maritime Sciences, Faculty of Maritime Sciences, Kobe University, Kobe 658-0022, Japan; [okamura@maritime.kobe-u.ac.jp](mailto:okamura@maritime.kobe-u.ac.jp) (H.O.); [horie@people.kobe-u.ac.jp](mailto:horie@people.kobe-u.ac.jp) (Y.H.);

<sup>3</sup>Faculty of Science and Marine Environment, Universiti Malaysia Terengganu, 21030 Kuala Nerus, Terengganu, Malaysia; [ong@umt.edu.my](mailto:ong@umt.edu.my) (M.C.O.);

<sup>4</sup>Ocean Pollution and Ecotoxicology (OPEC) Research Group, Universiti Malaysia Terengganu, 21030 Kuala Nerus, Terengganu; [ong@umt.edu.my](mailto:ong@umt.edu.my) (M.C.O.);

<sup>5</sup>Fisheries Research Institute, Batu Maung, 11960 Pulau Pinang, Malaysia; [saupi@rocketmail.com](mailto:saupi@rocketmail.com) (M.S.I.);

<sup>6</sup>Faculty of Health and Life Sciences, INTI International University, Persiaran Perdana BBN, 71800 Nilai, Negeri Sembilan, Malaysia; [kumar.krishnan@newinti.edu.my](mailto:kumar.krishnan@newinti.edu.my) (K.K.); [wanhee.cheng@newinti.edu.my](mailto:wanhee.cheng@newinti.edu.my) (W.H.C.);

<sup>7</sup>Institute of Physics and Technology, Ural Federal University, Yekaterinburg 620002, Russia; [h.m.zakaly@azhar.edu.eg](mailto:h.m.zakaly@azhar.edu.eg) (H.M.H.Z.)

<sup>8</sup>Physics Department, Faculty of Science, Al-Azhar University, Assuit Branch, 71524 Egypt; [h.m.zakaly@azhar.edu.eg](mailto:h.m.zakaly@azhar.edu.eg) (H.M.H.Z.)

\* Correspondence: [yapchee@upm.edu.my](mailto:yapchee@upm.edu.my)

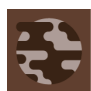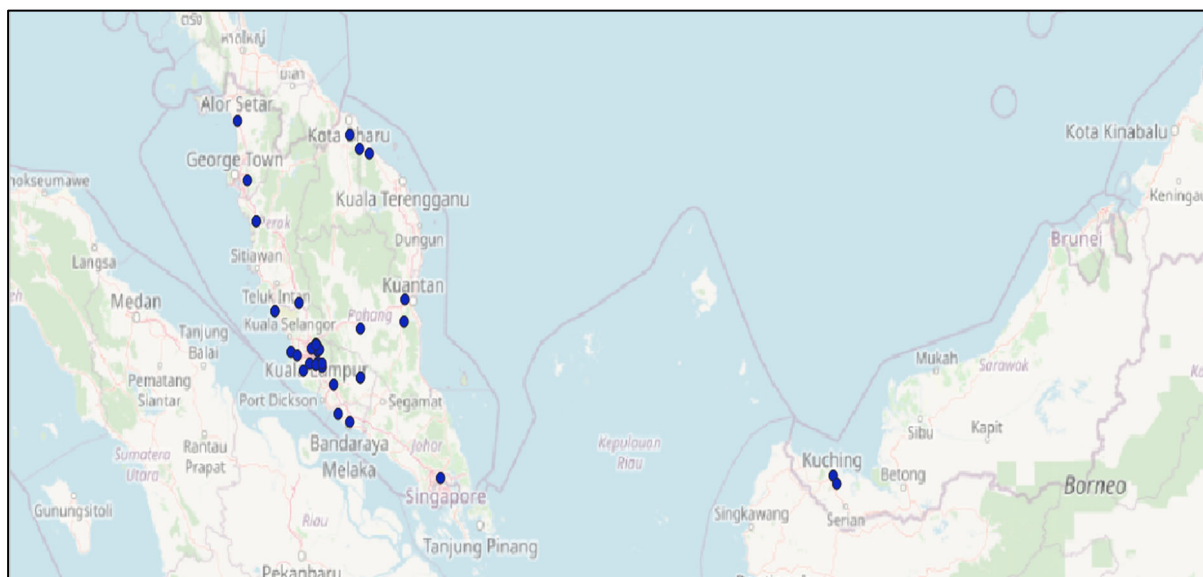

Figure S1: The purchase sites for 40 species of fish, some sites were not shown due to similar purchase location and distance settings. The sites were plotted via QGIS software.

Table S1: Purchased commercial fish from different purchase sites and dates.

| Site | Common name                                          | Scientific name                      | Purchase date | Purchase site                                      | GPS of purchase site   |
|------|------------------------------------------------------|--------------------------------------|---------------|----------------------------------------------------|------------------------|
| 1    | Butterfish (Daun baru)                               | <i>Drepana punctata</i>              | 25 April 2023 | Pasar Malam Sri Serdang, Selangor                  | 3°01.336', 101°70.115' |
| 2    | Yellowstripe scad (ikan selar kuning)                | <i>Selaroides leptolepis</i>         | 1 May 2023    | Segi Fresh, Batu Caves                             | 3°24.990', 101°66.273' |
| 3    | Gold-spotted sweetlips (Ikan kaci)                   | <i>Plectorhinchus flavomaculatus</i> | 25 April 2023 | Pasar Besar, Kuantan                               | 2°81.431', 102°41.265' |
| 4    | Rainbow runner (Ikan pisang-pisang)                  | <i>Elagatis bipinnulata</i>          | 28 April 2023 | Lotus Hypermarket Bahau, Negeri Sembilan           | 2°81.431', 102°41.265' |
| 5    | Silver White Croaker (Ikan Gelama)                   | <i>Pemahia argentata</i>             | 1 May 2023    | Chow Kit Road Market, KL                           | 3°16.506', 101°69.589' |
| 6    | Threadfin sea catfish (Ikan Duri Jahan)              | <i>Arius arius</i>                   | 1 May 2023    | Chow Kit Road Market, KL                           | 3°16.506', 101°69.589' |
| 7    | Bigeye scad (Ikan Lolong Mata Besar)                 | <i>Selar crumenophthalmus</i>        | 3 May 2023    | Pasar Jabi, Besut, Terengganu                      | 5°67.652', 102°56.542' |
| 8    | Starry triggerfish (Ikan jebong)                     | <i>Abalistes stellaris</i>           | 26 April 2023 | ZEMART, Seremban, Negeri sembilan                  | 2°72.616', 101°96.263' |
| 9    | Grouper (Ikan kerapu balong)                         | <i>Epinephelus tauvina</i>           | 3 May 023     | Pasar Kok Lanis, Ketereh, Kelantan                 | 5°91.709', 102°24.104' |
| 10   | Fourfinger threadfin (Senangin)                      | <i>Eleutheronema tetradactylum</i>   | 25 April 2023 | Pasar Awam Sungai Besar, Selangor                  | 3°66.414', 100°98.473' |
| 11   | Barred Javelin (Ikan gerut)                          | <i>Pomadasys kakaan</i>              | 28 April 2023 | Unknown                                            |                        |
| 12   | Hound Needlefish (Ikan banang)                       | <i>Tylosurus crocodilus</i>          | 26 April 2023 | GIANT hypermarket, Batu Caves, Selangor            | 3°23.488', 101°69.162' |
| 13   | Fringescale Sardinella (Ikan Tamban Sisek)           | <i>Sardinella fimbriata</i>          | 2 May 2023    | Pasar Borong Seri Kembangan, Selangor              | 2°98.477', 101°66.762' |
| 14   | Indian mackerel (kembong)                            | <i>Rastrelliger kanagurta</i>        | 27 April 2023 | Kedai Runcit Tanah Puteh, Pekan, Pahang            | 3°53.417', 103°15.428' |
| 15   | Longtail tuna (ikan tongkol hitam)                   | <i>Thunnus tonggol</i>               | 25 April 2023 | Pasar Tani Slim River, Perak                       | 3°76.479', 101°38.128' |
| 16   | Eastern Little Tuna (Ikan tongkol putih / Aya kurik) | <i>Euthynnus affinis</i>             | 29 April 2023 | Hassan Mart, Bandar Sungai Buaya, Rawang, Selangor | 3°14.257', 101°25.351' |
| 17   | Black pomfret (bawal hitam)                          | <i>Parastromateus niger</i>          | 27 April 2023 | AEON Supermarket Shah Alam, Selangor               | 2°99.086', 101°57.226' |
| 18   | Blackfin scad (pelata)                               | <i>Alepes melanoptera</i>            | 28 April 2023 | Pasar Borong Batu Berendam, Melaka                 | 2°25.449', 102°23.697' |
| 19   | Oxeeye Scad (Lolong Kuning)                          | <i>Selar boops</i>                   | 29 April 2023 | Kedai Runcit Arridzky Enterprise, Selangor         | 2°95.461', 101°77.636' |
| 20   | Obtuse barracuda (ikan kacang-kacang)                | <i>Sphyræna obtusata</i>             | 28 April 2023 | Pasar Borong Selayang, Selangor                    | 3°23.611', 101°66.655' |
| 21   | Climbing perch (ikan puyu)                           | <i>Anabas testudineus</i>            | 5 May 2023    | Pasar Borong Seri Kembangan, Selangor              | 2°98.477', 101°66.762' |
| 22   | Hardtail scad (ikan cincaru)                         | <i>Megalaspis cordyla</i>            | 25 April 2023 | S'mart Pandan Jaya Selangor                        | 3°10.087', 101°35.886' |
| 23   | Sulphur Goatfish (Ikan Biji Nangka)                  | <i>Upeneus sulphureus</i>            | 30 April 2023 | Unknown                                            |                        |
| 24   | Indo-pacific mackerel (ikan pelaling)                | <i>Rastrelliger brancysoma</i>       | 18 April 2023 | Kedai runcit rezeki mulia, Kajang                  | 2°99.921', 101°76.921' |

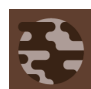

|    |                                                   |                                |               |                                                   |                        |
|----|---------------------------------------------------|--------------------------------|---------------|---------------------------------------------------|------------------------|
| 25 | Largehead hairtail (Ikan Timah/<br>Selayur)       | <i>Trichiurus lepturus</i>     | 25 April 2023 | BS Freshmart frozen Temerloh, Pahang              | 3°44.515', 102°42.171' |
| 26 | Streaked spinefoot (Ikan dengkis)                 | <i>Siganus javus</i>           | 31 March 2023 | Pasar Borong Pandan, Johor Bharu, Johor           | 1°52.604', 103°76.163' |
| 27 | Yellowtail scad (ikan selar)                      | <i>Atule mate</i>              | 29 April 2023 | Pasar Keramat, Kuala Lumpur                       | 3°17.132', 101°73.508' |
| 28 | Barramundi (Ikan siakap)                          | <i>Lates calcarifer</i>        | 1 May 2023    | Hero Market, Damansara Damai, Selangor            | 3°19.178', 101°59.072' |
| 29 | Fivelined threadfin bream (Kerisi jalur<br>lima)  | <i>Nemipterus tambuloides</i>  | 26 April 2023 | Nirwana Maju Sdn Bhd, Kuala Berang,<br>Terengganu | 2°35.369', 102°03.889' |
| 30 | Indo Pacific King Mackerel (Dengkih)              | <i>Scomberomorus guttatus</i>  | 27 April 2023 | Pasar Matang, Perak                               | 4°81.432', 100°67.386' |
| 31 | Narrow-barred Spanish Mackerel<br>(Ikan Tenggiri) | <i>Scomberomorus commerson</i> | 27 April 2023 | Pasar Matang, Perak                               | 4°81.432', 100°67.386' |
| 32 | Longfin Trevally (Ikan Cermin)                    | <i>Carangoides armatus</i>     | 28 April 2023 | TMG Mart Kuantan, Pahang                          | 3°82.412', 103°15.944' |
| 33 | Chevron/Military barracuda                        | <i>Sphyaera putnamae</i>       | 21 April 2023 | Econsave Baling, Kedah                            | 5°65.650', 100°87.019' |
| 34 | White Sardine (ikan sardin putih)                 | <i>Escualosa thoracata</i>     | 28 April 2023 | Pasar Awam Taman Kenari, Kedah                    | 5°58.041', 100°28.312' |
| 35 | Indian threadfin (Kurau)                          | <i>Leptomelanosoma indicum</i> | 28 April 2023 | Pasar Awam Telok Panglima Garang,<br>Selangor     | 2°90.330', 100°85.930' |
| 36 | Doublespotted queenfish<br>(Ikan talang)          | <i>Scomberoides lysan</i>      | 27 April 2023 | Pasar Besar Alor Setar, Kedah                     | 6°10.358', 99°74.079'  |
| 37 | Toli Shad (terubuk)                               | <i>Tenualosa toli</i>          | 27 April 2023 | Kampung Boyan Kuching, Sarawak                    | 1°56.144', 110°35.026' |
| 38 | Diamond trevally ( Rambai Ebek)                   | <i>Alectis indicus</i>         | 25 April 2023 | Market Bandar Riyal, Samarahan, Sarawak           | 1°45.551', 110°40.863' |
| 39 | Shortfin scad (Ikan selayang)                     | <i>Decapterus macrosoma</i>    | 26 April 2023 | Pasaraya Shakri Padang Luas Jerneh                | 5°74.024', 102°40.577' |
| 40 | Bluespot mullet<br>(Belanak/ Kedera Tanda Biru)   | <i>Valamugil seheli</i>        | 27 April 2023 | Pasar Awam Sungai Besar, Selangor                 | 3°66.414', 99°76.782'  |

Table S2: Description of the purchased commercial fish, biometric features, water content and conversion factors of dorsal parts of the fish samples.

| Niche Habitat                     | Scientific name                      | N | Range of weight (g) | Range of length (cm) | Water content (%) | Conversion factor |
|-----------------------------------|--------------------------------------|---|---------------------|----------------------|-------------------|-------------------|
| Family Ariidae                    |                                      |   |                     |                      |                   |                   |
| Amphidromous                      | <i>Arius arius</i>                   | 3 | 20-40               | 24.5-28.9            | 91.34             | 0.087             |
| Family Anabantidae                |                                      |   |                     |                      |                   |                   |
| Demersal<br>Potamodromous         | <i>Anabas testudineus</i>            | 3 | 7.25-26.66          | 15.7-17.2            | 71.38             | 0.286             |
| Family Balastidae                 |                                      |   |                     |                      |                   |                   |
| Amphidromous                      | <i>Abalistes stellaris</i>           | 3 | 18-25               | 31.0-34.0            | 80.00             | 0.200             |
| Family Belanidae                  |                                      |   |                     |                      |                   |                   |
| Reef-associated,<br>Oceanodromous | <i>Tylosurus crocodilus</i>          | 3 | 3-5                 | 48.3-55.9            | 78.80             | 0.212             |
| Family Carangidae                 |                                      |   |                     |                      |                   |                   |
| Reef-associated                   | <i>Alectis indicus</i>               | 3 | 15.4-19.9           | 16.0-19.0            | 30.61             | 0.694             |
| Pelagic neritic,<br>tropical      | <i>Alepes melanoptera</i>            | 3 | 30-43               | 19.0-20.0            | 83.05             | 0.169             |
| Reef associated                   | <i>Atule mate</i>                    | 3 | 10-13               | -                    | 82.21             | 0.178             |
| Reef-associated                   | <i>Carangoides armatus</i>           | 3 | 12-20               | 18.3-20.2            | 81.41             | 0.186             |
| Reef associated                   | <i>Decapterus macrosoma</i>          | 5 | 10.0-11.0           | 19.8-22.5            | 73.80             | 0.262             |
| Reef associated                   | <i>Elagatis bipinnulata</i>          | 3 | 8-12                | 29.0-33.3            | 75.62             | 0.244             |
| Reef associated                   | <i>Megalaspis cordyla</i>            | 3 | -                   | -                    | 80.00             | 0.200             |
| reef-associated;<br>amphidromous  | <i>Parastrumateus niger</i>          | 3 | 17-26               | 19.0-28.5            | 77.47             | 0.225             |
| Reef associated                   | <i>Scomberoides lysan</i>            | 3 | -                   | -                    | 80.00             | 0.200             |
| Reef associated                   | <i>Selar boops</i>                   | 3 | 10-20               | 20.0-25.0            | 89.90             | 0.101             |
| Reef-associated                   | <i>Selar crumenophthalmus</i>        | 3 | 18-23               | 27.6-30.5            | 77.64             | 0.224             |
| Reef associated                   | <i>Selaroides leptolepis</i>         | 3 | 6-9                 | 14.7-16.4            | 80.02             | 0.200             |
| Family Dorosomatidae              |                                      |   |                     |                      |                   |                   |
| Pelagic-neritic,<br>Amphidromous  | <i>Escualosa thoracata</i>           | 3 | 12-32               | -                    | 80.00             | 0.200             |
| Pelagic-neritic,<br>anadromous    | <i>Tenualosa toli</i>                | 3 | 24-42               | 30.0-32.7            | 80.00             | 0.200             |
| Pelagic- Neritic                  | <i>Sardinella fimbriata</i>          | 3 | 3.8-4.3             | 20.0-21.0            | 56.19             | 0.438             |
| Family Drepaneidae                |                                      |   |                     |                      |                   |                   |
| Reef associated                   | <i>Drepana punctata</i>              | 3 | 30-60               | 17.0-18.8            | 91.89             | 0.081             |
| Family Epinephelidae              |                                      |   |                     |                      |                   |                   |
| Oceanodromous                     | <i>Epinephelus tauvina</i>           | 3 | 9-22                | 16.5-18.5            | 81.30             | 0.187             |
| Family Haemulidae                 |                                      |   |                     |                      |                   |                   |
| reef-associated                   | <i>Plectorhinchus flavomaculatus</i> | 3 | 17-25               | 21.0-26.0            | 81.56             | 0.184             |
| Reef-associated                   | <i>Pomadasys kakaan</i>              | 3 | 18-27               | 29.3-32.2            | 78.39             | 0.216             |
| Family Latidae                    |                                      |   |                     |                      |                   |                   |

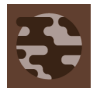

|                                |                                    |   |           |           |       |       |
|--------------------------------|------------------------------------|---|-----------|-----------|-------|-------|
| Catadromous                    | <i>Lates calcarifer</i>            | 2 | 9-12      | 28.0-31.0 | 77.91 | 0.221 |
| Family Mugillidae              |                                    |   |           |           |       |       |
| Catadromous, Reef-associated   | <i>Valumugil seheli</i>            | 3 | 3-4       | 16.5-16.8 | 80.00 | 0.200 |
| Family Mullidae                |                                    |   |           |           |       |       |
| Demersal, Oceanodromous        | <i>Upeneus sulphureus</i>          | 3 | -         | -         | 91.89 | 0.081 |
| Family Nemipteridae            |                                    |   |           |           |       |       |
| Demersal                       | <i>Nemipterus tumbuloides</i>      | 2 | 10-20     | 23.0-26.0 | 83.59 | 0.164 |
| Family Polynemidae             |                                    |   |           |           |       |       |
| Pelagic-neritic                | <i>Eleutheronema tetradactylum</i> | 3 | 10-12     | 24.1-25.3 | 71.25 | 0.287 |
| Demersal, amphidromous         | <i>Leptomelanosoma indicum</i>     | 3 | 10-23     | 29.4-34.2 | 79.82 | 0.202 |
| Family Sciaemidae              |                                    |   |           |           |       |       |
| Benthopelagic, Oceanodromous   | <i>Pennahia argentata</i>          | 3 | 8-14      | 17.5-18.4 | 83.30 | 0.167 |
| Family Scombridae              |                                    |   |           |           |       |       |
| Pelagic neritic, Oceanodromous | <i>Euthynnus affinis</i>           | 3 | 245-315   | 46.9-48.2 | 91.89 | 0.081 |
| Pelagic-Neritic, Oceanodromous | <i>Rastrelliger brancysoma</i>     | 3 | 7-10      | 16.0-17.0 | 74.74 | 0.253 |
| Pelagic neritic, Oceanodromous | <i>Rastrelliger kanagurta</i>      | 3 | 8-11      | 23.0-23.6 | 76.60 | 0.234 |
| Pelagic-neritic, Oceanodromous | <i>Scomberomorus commerson</i>     | 3 | 11.3-11.7 | 37.4-40.5 | 66.13 | 0.339 |
| Pelagic-neritic, oceanodromous | <i>Scomberomorus guttatus</i>      | 3 | 10.8-19.4 | 37.4-40.5 | 78.13 | 0.219 |
| Pelagic neritic, Oceanodromous | <i>Thunnus tonggol</i>             | 3 | 50        | 26.9-29.0 | 80.00 | 0.200 |
| Family Siganidae               |                                    |   |           |           |       |       |
| Reef associated, Oceanodromous | <i>Siganus javus</i>               | 2 | 9-12      | 22.0-23.8 | 50.88 | 0.491 |
| Family Sphraemidae             |                                    |   |           |           |       |       |
| Reef associated                | <i>Sphyaena obtusata</i>           | 3 | 72-102    | 51.0-56.0 | 90.57 | 0.094 |
| Reef-associated                | <i>Sphyaera putnamae</i>           | 3 | 46-61     | 41.0-43.0 | 80.17 | 0.198 |
| Family Trichiuridae            |                                    |   |           |           |       |       |
| Benthopelagic, amphidromous    | <i>Trichiurus lepturus</i>         | 3 | 23-69     | 80.0-93.0 | 76.85 | 0.232 |

Table S3: Values of estimated daily intake (EDI) (mg/kg bw), target hazard quotient (THQ), and estimated weekly intake (EWI; mg/kg bw) to the provisional tolerable weekly intake (PTWI; mg/kg bw) of Cu in fish (n=40) from the present study.

| No. | Species                              | Mean weight (g) | Length (cm) | Location                                           | WC   | CF   | DW   | WW   | EDI  | High EDI | THQ   | High THQ | EWI   | High EWI | PTWI% | High PTWI % |
|-----|--------------------------------------|-----------------|-------------|----------------------------------------------------|------|------|------|------|------|----------|-------|----------|-------|----------|-------|-------------|
| 1   | <i>Drepana punctata</i>              | 267             | 18.1        | Pasar Malam Sri Serdang, Selangor                  | 91.8 | 0.08 | 4.01 | 0.33 | 0.53 | 1.06     | 0.013 | 0.027    | 3.72  | 7.44     | 0.086 | 0.171       |
| 2   | <i>Selaroides leptolepis</i>         | 430             | 15.5        | Segi Fresh, Batu Caves                             | 80.0 | 0.20 | 3.93 | 0.79 | 1.27 | 2.53     | 0.032 | 0.063    | 8.87  | 17.7     | 0.011 | 0.022       |
| 3   | <i>Plectorhinchus flavomaculatus</i> | 213             | 23.8        | Pasar Besar, Kuantan                               | 81.6 | 0.18 | 1.93 | 0.36 | 0.57 | 1.15     | 0.014 | 0.029    | 4.01  | 8.02     | 0.002 | 0.004       |
| 4   | <i>Elagatis bipinnulata</i>          | 418             | 31.0        | Lotus Hypermarket Bahau, Negeri Sembilan           | 75.6 | 0.24 | 2.11 | 0.51 | 0.83 | 1.66     | 0.054 | 0.108    | 5.81  | 11.6     | 0.002 | 0.005       |
| 5   | <i>Pennahia argentata</i>            | 53.3            | 17.9        | Chow Kit Road Market, KL                           | 83.3 | 0.17 | 2.34 | 0.39 | 0.63 | 1.26     | 0.016 | 0.032    | 4.41  | 8.82     | 0.000 | 0.001       |
| 6   | <i>Arius arius</i>                   | 152             | 26.5        | Chow Kit Road Market, KL                           | 91.3 | 0.09 | 0.72 | 0.06 | 0.10 | 0.20     | 0.003 | 0.005    | 0.70  | 1.41     | 0.004 | 0.008       |
| 7   | <i>Selar crumenophthalmus</i>        | 167.33          | 29.3        | Pasar Jabi, Besut, Terengganu                      | 77.6 | 0.22 | 3.46 | 0.77 | 1.25 | 2.50     | 0.031 | 0.062    | 8.73  | 17.5     | 0.007 | 0.013       |
| 8   | <i>Abalistes stellaris</i>           | 625             | 32.7        | ZEMART, Seremban, Negeri sembilan                  | 80.0 | 0.20 | 82.3 | 16.5 | 26.6 | 53.1     | 0.664 | 1.327    | 186   | 372      | 0.008 | 0.016       |
| 9   | <i>Epinephelus tauvina</i>           | 156             | 17.5        | Pasar Kok Lanas, Ketereh, Kelantan                 | 81.3 | 0.19 | 5.42 | 1.01 | 1.63 | 3.27     | 0.041 | 0.082    | 11.44 | 22.9     | 0.002 | 0.003       |
| 10  | <i>Eleutheronema tetradactylum</i>   | 140             | 24.6        | Pasar Awam Sungai Besar, Selangor                  | 71.3 | 0.29 | 2.68 | 0.77 | 1.24 | 2.49     | 0.031 | 0.062    | 8.70  | 17.4     | 0.003 | 0.005       |
| 11  | <i>Pomadasys kakaan</i>              | 305             | 30.4        |                                                    | 78.4 | 0.22 | 3.45 | 0.75 | 1.20 | 2.40     | 0.030 | 0.060    | 8.42  | 16.8     | 0.004 | 0.008       |
| 12  | <i>Tylosurus crocodilus</i>          | 155             | 51.1        | GIANT hypermarket, Batu Caves, Selangor            | 78.8 | 0.21 | 79.9 | 16.9 | 27.3 | 54.6     | 0.683 | 1.365    | 191   | 382      | 0.005 | 0.011       |
| 13  | <i>Sardinella fimbriata</i>          | 103             | 20.6        | Pasar Borong Seri Kembangan, Selangor              | 56.2 | 0.44 | 7.91 | 3.46 | 5.59 | 11.2     | 0.140 | 0.279    | 39.1  | 78.2     | 0.029 | 0.057       |
| 14  | <i>Rastrelliger kanagurta</i>        | 139             | 23.3        | Kedai Runcit Tanah Puteh, Pekan, Pahang            | 76.6 | 0.23 | 8.89 | 2.08 | 3.36 | 6.71     | 0.084 | 0.168    | 23.4  | 46.9     | 0.002 | 0.003       |
| 15  | <i>Thunnus tonggol</i>               | 295             | 27.8        | Pasar Tani Slim River, Perak                       | 80.0 | 0.20 | 5.41 | 1.08 | 1.75 | 3.49     | 0.044 | 0.087    | 12.2  | 24.4     | 0.001 | 0.002       |
| 16  | <i>Euthynnus affinis</i>             | 1502            | 47.5        | Hassan Mart, Bandar Sungai Buaya, Rawang, Selangor | 91.0 | 0.09 | 3.70 | 0.33 | 0.54 | 1.07     | 0.013 | 0.027    | 3.76  | 7.52     | 0.005 | 0.011       |

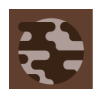

|    |                                |      |      |                                                |      |      |      |      |      |      |       |       |      |      |       |       |
|----|--------------------------------|------|------|------------------------------------------------|------|------|------|------|------|------|-------|-------|------|------|-------|-------|
| 17 | <i>Parastromateus niger</i>    | 538  | 28.5 | AEON Supermarket Shah Alam, Selangor           | 77.5 | 0.23 | 1.35 | 0.30 | 0.49 | 0.98 | 0.012 | 0.024 | 3.43 | 6.86 | 0.001 | 0.002 |
| 18 | <i>Alepes melanoptera</i>      | 110  | 19.5 | Pasar Borong Batu Berendam,                    | 83.1 | 0.17 | 2.44 | 0.41 | 0.67 | 1.33 | 0.017 | 0.033 | 4.66 | 9.32 | 0.021 | 0.043 |
| 19 | <i>Selar boops</i>             | 160  | 22.3 | Kedai Runcit Arridzky Enterprise, Selangor     | 89.9 | 0.10 | 4.51 | 0.46 | 0.73 | 0.98 | 0.012 | 0.024 | 3.43 | 6.86 | 0.002 | 0.003 |
| 20 | <i>Sphyaena obtusata</i>       | 625  | 52.5 | Pasar Borong Selayang, Selangor                | 90.6 | 0.09 | 2.55 | 0.24 | 0.39 | 1.33 | 0.017 | 0.033 | 4.66 | 9.32 | 0.002 | 0.004 |
| 21 | <i>Anabas testudineus</i>      | 86.3 | 16.7 | Pasar Borong Seri Kembangan, Selangor          | 71.4 | 0.29 | 4.35 | 1.24 | 2.01 | 1.47 | 0.018 | 0.037 | 5.14 | 10.3 | 0.002 | 0.004 |
| 22 | <i>Megalaspis cordyla</i>      |      |      | S' mart Pandan Jaya Selangor                   | 80.0 | 0.20 | 4.75 | 0.95 | 1.53 | 0.77 | 0.010 | 0.019 | 2.71 | 5.41 | 0.004 | 0.008 |
| 23 | <i>Upeneus sulphureus</i>      |      |      |                                                | 91.9 | 0.08 | 1.39 | 0.11 | 0.18 | 0.36 | 0.005 | 0.009 | 1.27 | 2.55 | 0.012 | 0.023 |
| 24 | <i>Rastrelliger brancysoma</i> | 150  | 16.7 |                                                | 74.7 | 0.25 | 8.88 | 2.24 | 3.62 | 7.24 | 0.090 | 0.181 | 25.3 | 50.7 | 0.011 | 0.022 |
| 25 | <i>Trichiurus lepturus</i>     | 596  | 90.3 | BS Freshmart frozen Temerloh, Pahang           | 76.8 | 0.23 | 7.70 | 1.78 | 2.87 | 5.74 | 0.072 | 0.144 | 20.1 | 40.2 | 0.018 | 0.036 |
| 26 | <i>Siganus javus</i>           | 151  | 22.9 | Pasar Borong Pandan, Johor Bharu, Johor        | 50.9 | 0.49 | 6.74 | 3.31 | 5.34 | 10.7 | 0.133 | 0.267 | 37.4 | 74.7 | 0.006 | 0.012 |
| 27 | <i>Atule mate</i>              | 151  | 22.7 | Pasar Keramat, Kuala Lumpur                    | 82.2 | 0.18 | 4.56 | 0.81 | 1.31 | 2.61 | 0.033 | 0.065 | 9.15 | 18.3 | 0.011 | 0.021 |
| 28 | <i>Lates calcarifer</i>        | 330  | 29.5 | Hero Market, Damansara Damai, Selangor         | 77.9 | 0.22 | 0.78 | 0.17 | 0.28 | 0.55 | 0.007 | 0.014 | 1.94 | 3.88 | 0.030 | 0.060 |
| 29 | <i>Nemipterus tumbuloides</i>  | 185  | 24.5 | Nirwana Maju Sdn Bhd, Kuala Berang, Terengganu | 83.6 | 0.16 | 25.1 | 4.12 | 6.65 | 13.3 | 0.166 | 0.332 | 46.5 | 93.0 | 0.002 | 0.003 |
| 30 | <i>Scomberomorus guttatus</i>  | 350  | 38.6 | Pasar Matang , Perak .                         | 78.1 | 0.22 | 26.3 | 5.76 | 9.29 | 18.6 | 0.232 | 0.465 | 65.0 | 130  | 0.004 | 0.008 |
| 31 | <i>Scomberomorus commerson</i> | 350  | 38.0 | Matang, Perak                                  | 66.1 | 0.34 | 5.96 | 2.02 | 3.26 | 6.51 | 0.081 | 0.163 | 22.8 | 45.6 | 0.004 | 0.008 |
| 32 | <i>Carangoides armatus</i>     | 123  | 19.4 | TMG Mart Kuantan, Pahang                       | 81.4 | 0.19 | 6.87 | 1.28 | 2.06 | 4.12 | 0.052 | 0.103 | 14.4 | 28.8 | 0.017 | 0.034 |
| 33 | <i>Sphyaera putnamae</i>       | 351  | 43.0 | Econsave Baling, Kedah                         | 80.2 | 0.20 | 2.55 | 0.51 | 0.82 | 1.63 | 0.020 | 0.041 | 5.71 | 11.4 | 0.003 | 0.005 |
| 34 | <i>Escualosa thoracata</i>     |      |      | Pasar Awam Taman Kenari, Kedah                 | 80.0 | 0.20 | 27.4 | 5.48 | 8.84 | 17.7 | 0.221 | 0.442 | 61.9 | 124  | 0.002 | 0.004 |
| 35 | <i>Leptomelanosoma indicum</i> | 284  | 31.9 | Pasar Awam Telok Panglima Garang, Selangor     | 79.8 | 0.20 | 5.22 | 1.05 | 1.70 | 3.40 | 0.042 | 0.085 | 11.9 | 23.8 | 0.002 | 0.005 |



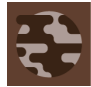

|    |                             |      |      |                                            |      |      |      |      |      |      |       |       |      |      |       |       |
|----|-----------------------------|------|------|--------------------------------------------|------|------|------|------|------|------|-------|-------|------|------|-------|-------|
| 36 | <i>Scomberoides lysan</i>   |      |      | Pasar Besar Alor Setar,<br>Kedah           | 80.0 | 0.20 | 5.92 | 1.18 | 1.91 | 3.82 | 0.048 | 0.095 | 13.4 | 26.7 | 0.006 | 0.011 |
| 37 | <i>Tenuaulosa toli</i>      | 277  | 31.4 | Kampung Boyan<br>Kuching, Sarawak          | 80.0 | 0.20 | 2.22 | 0.44 | 0.72 | 1.43 | 0.018 | 0.036 | 5.01 | 10.0 | 0.009 | 0.019 |
| 38 | <i>Alectis indicus</i>      | 10.6 | 17.5 | Market Bandar Riyal,<br>Samarahan, Sarawak | 80.0 | 0.20 | 10.8 | 2.16 | 3.48 | 6.97 | 0.087 | 0.174 | 24.4 | 48.8 | 0.088 | 0.176 |
| 39 | <i>Decapterus macrosoma</i> | 104  | 20.6 | Pasaraya Shakri<br>Padang Luas Jerneh      | 73.8 | 0.26 | 5.85 | 1.53 | 2.47 | 4.94 | 0.062 | 0.124 | 17.3 | 34.6 | 0.001 | 0.001 |
| 40 | <i>Valumugil seheli</i>     | 46.7 | 16.7 | Pasar Awam Sungai<br>Besar, Selangor       | 80.0 | 0.20 | 16.2 | 3.25 | 5.24 | 10.5 | 0.131 | 0.262 | 367  | 73.3 | 0.017 | 0.034 |

Note: DW= dry weight basis; WW= wet weight basis; WC= water content in %; CF= conversion factor; High= two times consumption of the normal consumption rate.

Table S4: Values of estimated daily intake (EDI) (mg/kg bw), target hazard quotient (THQ), and estimated weekly intake (EWI; mg/kg bw) to the provisional tolerable weekly intake (PTWI; mg/kg bw) of Cu in fish (N= 99), based on Cu cited data in the literature.

| No. | Species                            | DW    | WW   | EDI  | High EDI | THQ   | High THQ | EWI  | High EWI | PTWI% | High PTWI % | References                |
|-----|------------------------------------|-------|------|------|----------|-------|----------|------|----------|-------|-------------|---------------------------|
| 1   | <i>Alectis indicus</i>             | 3.33  | 0.70 | 1.13 | 2.26     | 0.028 | 0.056    | 7.90 | 15.8     | 0.004 | 0.007       | Yap & Mutairi [29]        |
| 2   | <i>Anabas testudineus</i>          | 2.27  | 0.65 | 1.05 | 0.77     | 0.010 | 0.019    | 2.71 | 5.41     | 0.001 | 0.002       | Sarker et al. [48]        |
| 3   | <i>Atule mate</i>                  | 5.00  | 1.53 | 2.47 | 4.94     | 0.062 | 0.123    | 17.3 | 34.6     | 0.008 | 0.016       | Ong et al. [46]           |
|     |                                    | 5.17  | 0.92 | 1.48 | 2.97     | 0.037 | 0.074    | 10.4 | 20.8     | 0.005 | 0.010       | Wan Azmi et al. [58]      |
|     |                                    | 7.83  | 1.80 | 2.9  | 5.81     | 0.073 | 0.145    | 20.3 | 40.7     | 0.009 | 0.019       | Yap & Mutairi [29]        |
| 4   | <i>Decapterus macrosoma</i>        | 3.48  | 0.70 | 1.13 | 2.26     | 0.028 | 0.056    | 7.90 | 15.8     | 0.004 | 0.007       | Agusa et al [55]          |
|     |                                    | 6.11  | 1.22 | 1.97 | 3.94     | 0.049 | 0.098    | 13.8 | 27.6     | 0.006 | 0.013       | Khalaf et al [20]         |
|     |                                    | 42.8  | 11.2 | 18.1 | 36.1     | 0.452 | 0.903    | 126  | 253      | 0.058 | 0.117       | Ong et al. [46]           |
|     |                                    | 3.36  | 0.88 | 1.42 | 2.84     | 0.035 | 0.071    | 9.94 | 19.9     | 0.005 | 0.009       | Wan Azmi et al [58]       |
|     |                                    | 7.12  | 1.42 | 2.29 | 4.58     | 0.057 | 0.115    | 16.0 | 32.1     | 0.007 | 0.015       | Yap & Mutairi [29]        |
| 5   | <i>Eleutheronema tetradactylum</i> | 4.70  | 1.35 | 2.18 | 4.35     | 0.054 | 0.109    | 15.2 | 30.5     | 0.007 | 0.014       | Deshpande et al [41]      |
| 6   | <i>Epinephelus tauvina</i>         | 1.34  | 0.25 | 0.40 | 0.81     | 0.010 | 0.020    | 2.82 | 5.65     | 0.001 | 0.003       | Ahmad & Al-Ghais [40]     |
|     |                                    | 1.02  | 0.19 | 0.31 | 0.61     | 0.008 | 0.015    | 2.15 | 4.29     | 0.001 | 0.002       | Ahmad & Al-Ghais [40]     |
| 7   | <i>Euthynnus affinis</i>           | 7.89  | 0.71 | 1.15 | 2.29     | 0.029 | 0.057    | 8.02 | 16.0     | 0.004 | 0.007       | Salam et al. [47]         |
| 8   | <i>Lates calcarifer</i>            | 1.09  | 0.22 | 0.35 | 0.71     | 0.009 | 0.018    | 2.48 | 4.97     | 0.001 | 0.002       | Agusa et al [55]          |
|     |                                    | 0.82  | 0.16 | 0.26 | 0.52     | 0.006 | 0.013    | 1.81 | 3.61     | 0.001 | 0.002       | Agusa et al [55]          |
|     |                                    | 1.21  | 0.27 | 0.43 | 0.86     | 0.011 | 0.022    | 3.02 | 6.03     | 0.001 | 0.003       | Agusa et al [55]          |
|     |                                    | 1.40  | 0.31 | 0.50 | 1.00     | 0.012 | 0.025    | 3.49 | 6.98     | 0.002 | 0.003       | Krishnamurthi & Nair [45] |
|     |                                    | 12.22 | 2.70 | 4.35 | 8.71     | 0.109 | 0.218    | 30.5 | 60.9     | 0.014 | 0.028       | Kamaruzzaman et al. [60]  |
| 9   | <i>Megalaspis cordyla</i>          | 2.21  | 0.51 | 0.82 | 3.06     | 0.038 | 0.077    | 10.7 | 21.5     | 0.005 | 0.010       | Agusa et al [55]          |
|     |                                    | 2.53  | 0.58 | 0.94 | 5.05     | 0.063 | 0.126    | 17.7 | 35.3     | 0.008 | 0.016       | Agusa et al [55]          |
|     |                                    | 2.48  | 0.57 | 0.92 | 3.32     | 0.042 | 0.083    | 11.6 | 23.3     | 0.005 | 0.011       | Agusa et al [55]          |
|     |                                    | 2.67  | 0.61 | 0.98 | 1.65     | 0.021 | 0.041    | 5.76 | 11.5     | 0.003 | 0.005       | Agusa et al [55]          |
|     |                                    | 2.96  | 0.68 | 1.10 | 1.87     | 0.023 | 0.047    | 6.55 | 13.1     | 0.003 | 0.006       | Agusa et al [55]          |
|     |                                    | 4.06  | 0.93 | 1.50 | 1.84     | 0.023 | 0.046    | 6.44 | 12.9     | 0.003 | 0.006       | Agusa et al [55]          |

|    |                                |      |      |      |      |       |       |      |      |       |       |                          |
|----|--------------------------------|------|------|------|------|-------|-------|------|------|-------|-------|--------------------------|
|    |                                | 3.57 | 0.82 | 1.32 | 1.97 | 0.025 | 0.049 | 6.89 | 13.8 | 0.003 | 0.006 | Agusa et al [55]         |
|    |                                | 2.81 | 0.65 | 1.05 | 2.19 | 0.027 | 0.055 | 7.68 | 15.4 | 0.004 | 0.007 | Agusa et al [55]         |
|    |                                | 4.39 | 1.01 | 1.63 | 3.00 | 0.038 | 0.075 | 10.5 | 21.0 | 0.005 | 0.010 | Agusa et al [55]         |
|    |                                | 3.60 | 0.83 | 1.34 | 2.65 | 0.033 | 0.066 | 9.26 | 18.5 | 0.004 | 0.009 | Agusa et al [55]         |
|    |                                | 1.51 | 0.35 | 0.56 | 5.19 | 0.065 | 0.130 | 18.2 | 36.4 | 0.008 | 0.017 | Fathi et al+[51]         |
|    |                                | 3.10 | 0.71 | 1.15 | 19.1 | 0.238 | 0.477 | 66.7 | 133  | 0.031 | 0.061 | Kamaruzzaman et al. [60] |
|    |                                | 1.43 | 0.33 | 0.53 | 1.03 | 0.013 | 0.026 | 3.61 | 7.23 | 0.002 | 0.003 | Nair et al [23]          |
|    |                                | 7.80 | 1.56 | 2.52 | 2.29 | 0.029 | 0.057 | 8.02 | 16.0 | 0.004 | 0.007 | Nurmadia et al [76]      |
|    |                                | 1.40 | 0.32 | 0.52 | 2.48 | 0.031 | 0.062 | 8.69 | 17.4 | 0.004 | 0.008 | Praveena & Lin [89]      |
|    |                                | 3.36 | 0.77 | 1.24 | 2.10 | 0.026 | 0.052 | 7.34 | 14.7 | 0.003 | 0.007 | Salam et al. [47]        |
|    |                                | 25.7 | 5.91 | 9.53 | 3.26 | 0.041 | 0.081 | 11.4 | 22.8 | 0.005 | 0.011 | Salam et al. [47]        |
|    |                                | 8.05 | 1.61 | 2.60 | 2.68 | 0.033 | 0.067 | 9.37 | 18.7 | 0.004 | 0.009 | Wan Azmi et al [58]      |
|    |                                | 4.47 | 1.03 | 1.66 | 2.10 | 0.026 | 0.052 | 7.34 | 14.7 | 0.003 | 0.007 | Yap & Mutairi [29]       |
| 10 | <i>Parastromateus niger</i>    | 0.13 | 0.03 | 0.05 | 0.10 | 0.001 | 0.002 | 0.34 | 0.68 | 0.000 | 0.000 | Tabezar et al. [49]      |
| 11 | <i>Pennahia argentata</i>      | 0.10 | 0.02 | 0.03 | 0.05 | 0.001 | 0.001 | 0.18 | 0.36 | 0.000 | 0.000 | Takarina et al [30]      |
|    |                                | 0.05 | 0.01 | 0.01 | 0.03 | 0.000 | 0.001 | 0.10 | 0.20 | 0.000 | 0.000 | Takarina et al [30]      |
| 12 | <i>Rastrelliger brancysoma</i> | 1.80 | 0.45 | 0.73 | 1.47 | 0.018 | 0.037 | 5.13 | 10.3 | 0.002 | 0.005 | Agusa et al [55]         |
| 13 | <i>Rastrelliger kanagurta</i>  | 1.94 | 0.50 | 0.81 | 1.61 | 0.02  | 0.04  | 5.65 | 11.3 | 0.003 | 0.005 | Agusa et al [55]         |
|    |                                | 1.09 | 0.28 | 0.45 | 0.90 | 0.011 | 0.023 | 3.16 | 6.32 | 0.001 | 0.003 | Agusa et al [55]         |
|    |                                | 2.69 | 0.70 | 1.13 | 2.26 | 0.028 | 0.056 | 7.90 | 15.8 | 0.004 | 0.007 | Agusa et al [55]         |
|    |                                | 1.64 | 0.43 | 0.69 | 1.39 | 0.017 | 0.035 | 4.85 | 9.71 | 0.002 | 0.004 | Agusa et al [55]         |
|    |                                | 5.56 | 1.30 | 2.1  | 4.19 | 0.052 | 0.105 | 14.7 | 29.4 | 0.007 | 0.014 | Arulkumar et al. [84]    |
|    |                                | 12.8 | 3.30 | 5.32 | 10.7 | 0.133 | 0.266 | 37.3 | 74.5 | 0.017 | 0.034 | Irwindi and Farida [57]  |
|    |                                | 2.00 | 0.52 | 0.84 | 1.68 | 0.021 | 0.042 | 5.87 | 11.7 | 0.003 | 0.005 | Kamaruzzaman et al [60]  |
|    |                                | 9.17 | 2.38 | 3.84 | 7.68 | 0.096 | 0.192 | 26.9 | 53.7 | 0.012 | 0.025 | Mziray and Kimirei [39]  |
|    |                                | 2.10 | 0.55 | 0.89 | 1.77 | 0.022 | 0.044 | 6.21 | 12.4 | 0.003 | 0.006 | Nair et al [23]          |
|    |                                | 3.80 | 0.89 | 1.44 | 2.87 | 0.036 | 0.072 | 10.1 | 20.1 | 0.005 | 0.009 | Nurnadia et al [76]      |
|    |                                | 2.15 | 0.56 | 0.90 | 1.81 | 0.023 | 0.045 | 6.32 | 12.7 | 0.003 | 0.006 | Praveena and Lin [89]    |
|    |                                | 2.75 | 0.72 | 1.16 | 2.32 | 0.029 | 0.058 | 8.13 | 16.3 | 0.004 | 0.007 | Rejomon et al [75]       |
|    |                                | 4.15 | 0.97 | 1.56 | 3.13 | 0.039 | 0.078 | 10.9 | 21.9 | 0.005 | 0.010 | Wan Azmi et al [58]      |

|    |                                |       |      |      |      |       |       |      |      |       |       |                          |
|----|--------------------------------|-------|------|------|------|-------|-------|------|------|-------|-------|--------------------------|
|    |                                | 5.56  | 1.45 | 2.34 | 4.68 | 0.058 | 0.117 | 16.4 | 32.7 | 0.008 | 0.015 | Yap & Mutairi [29]       |
|    |                                | 2.23  | 0.58 | 0.94 | 1.87 | 0.023 | 0.047 | 6.55 | 13.1 | 0.003 | 0.006 | Yap & Mutairi [29]       |
|    |                                | 4.10  | 0.96 | 1.55 | 3.10 | 0.039 | 0.077 | 10.8 | 21.7 | 0.005 | 0.010 | Yap & Mutairi [29]       |
| 14 | <i>Sardinella fimbriata</i>    | 7.33  | 3.21 | 5.18 | 10.4 | 0.129 | 0.259 | 36.2 | 72.5 | 0.017 | 0.033 | Praveena and Lin [89]    |
| 15 | <i>Scomberoides lysan</i>      | 1.37  | 0.27 | 0.44 | 0.88 | 0.011 | 0.022 | 3.09 | 6.19 | 0.001 | 0.003 | Agusa et al [55]         |
| 16 | <i>Scomberomorus commerson</i> | 1.33  | 0.31 | 0.50 | 1.00 | 0.013 | 0.025 | 3.50 | 7.00 | 0.002 | 0.003 | Agusa et al [55]         |
|    |                                | 5.52  | 1.27 | 2.05 | 4.10 | 0.051 | 0.102 | 14.3 | 28.7 | 0.007 | 0.013 | Ahmed et al [26]         |
|    |                                | 1.09  | 0.37 | 0.60 | 1.19 | 0.015 | 0.030 | 4.18 | 8.35 | 0.002 | 0.004 | Gu et al. [43]           |
|    |                                | 12.6  | 2.90 | 4.68 | 9.35 | 0.117 | 0.234 | 32.7 | 65.5 | 0.015 | 0.030 | Irwandi & Farida [57]    |
|    |                                | 0.89  | 0.30 | 0.48 | 0.97 | 0.012 | 0.024 | 3.39 | 6.77 | 0.002 | 0.003 | Wan Azmi et al [58]      |
|    |                                | 1.86  | 0.43 | 0.69 | 1.39 | 0.017 | 0.035 | 4.85 | 9.71 | 0.002 | 0.004 | Yap & Mutairi [29]       |
| 17 | <i>Selar crumenophthalmus</i>  | 2.94  | 0.66 | 1.06 | 2.12 | 0.027 | 0.053 | 7.42 | 14.4 | 0.003 | 0.007 | Agusa et al [55]         |
|    |                                | 2.16  | 0.48 | 0.78 | 1.56 | 0.019 | 0.039 | 5.45 | 10.9 | 0.003 | 0.005 | Agusa et al [55]         |
|    |                                | 2.23  | 0.50 | 0.80 | 1.61 | 0.020 | 0.040 | 5.63 | 11.3 | 0.003 | 0.005 | Agusa et al [55]         |
|    |                                | 2.06  | 0.46 | 0.74 | 1.49 | 0.019 | 0.037 | 5.20 | 10.4 | 0.002 | 0.005 | Agusa et al [55]         |
|    |                                | 1.91  | 0.43 | 0.69 | 1.38 | 0.017 | 0.034 | 4.82 | 9.64 | 0.002 | 0.004 | Agusa et al [55]         |
|    |                                | 2.46  | 0.55 | 0.89 | 1.77 | 0.022 | 0.044 | 6.21 | 12.4 | 0.003 | 0.006 | Agusa et al [55]         |
| 18 | <i>Selaroides leptolepis</i>   | 2.10  | 0.50 | 0.81 | 1.61 | 0.020 | 0.040 | 5.65 | 11.3 | 0.003 | 0.005 | Kamaruzzaman et al. [60] |
|    |                                | 7.05  | 1.41 | 2.27 | 4.55 | 0.057 | 0.114 | 15.9 | 31.8 | 0.007 | 0.015 | Nurnadia et al [76]      |
|    |                                | 2.46  | 0.59 | 0.95 | 1.90 | 0.024 | 0.048 | 6.66 | 13.3 | 0.003 | 0.006 | Praveena and Lin [89]    |
|    |                                | 2.50  | 0.50 | 0.81 | 1.61 | 0.020 | 0.040 | 5.65 | 11.3 | 0.003 | 0.005 | Wan Azmi et al [58]      |
|    |                                | 3.71  | 0.89 | 1.44 | 2.87 | 0.036 | 0.072 | 10.1 | 20.1 | 0.005 | 0.009 | Yap & Mutairi [29]       |
| 19 | <i>Sphyraena obtusata</i>      | 12.98 | 1.22 | 1.97 | 3.10 | 0.039 | 0.077 | 10.8 | 21.7 | 0.005 | 0.010 | Agusa et al [55]         |
|    |                                | 13.62 | 1.28 | 2.06 | 4.13 | 0.052 | 0.103 | 14.5 | 28.9 | 0.007 | 0.013 | Agusa et al [55]         |
|    |                                | 10.21 | 0.96 | 1.55 | 1.47 | 0.018 | 0.037 | 5.14 | 10.3 | 0.002 | 0.005 | Jaziri et al. [44]       |
| 20 | <i>Tenualosa toli</i>          | 2.71  | 0.54 | 0.87 | 1.75 | 0.022 | 0.044 | 6.12 | 12.2 | 0.003 | 0.006 | Yap & Mutairi [29]       |
| 21 | <i>Thunnus tonggol</i>         | 9.30  | 1.86 | 3.00 | 6.00 | 0.075 | 0.150 | 21.0 | 42.0 | 0.010 | 0.019 | Kamaruzzaman et al [60]  |
| 22 | <i>Trichiurus lepturus</i>     | 9.00  | 1.98 | 3.19 | 6.39 | 0.080 | 0.160 | 22.4 | 44.7 | 0.010 | 0.021 | Anandkumar et al. [81]   |
|    |                                | 2.49  | 0.62 | 1.00 | 2.00 | 0.025 | 0.050 | 7.00 | 14.0 | 0.003 | 0.006 | Rahman et al. [36]       |
|    |                                | 2.11  | 0.46 | 0.74 | 1.48 | 0.019 | 0.037 | 5.19 | 10.4 | 0.002 | 0.005 | Velusamy et al. [27]     |

|    |                             |      |      |      |      |       |       |      |      |       |       |                          |
|----|-----------------------------|------|------|------|------|-------|-------|------|------|-------|-------|--------------------------|
|    |                             | 2.99 | 0.66 | 1.06 | 2.13 | 0.027 | 0.053 | 7.45 | 14.9 | 0.003 | 0.007 | Yap & Mutairi [29]       |
| 23 | <i>Tylosurus crocodilus</i> | 0.52 | 0.11 | 0.18 | 0.35 | 0.004 | 0.009 | 1.24 | 2.48 | 0.001 | 0.001 | Ebrahim et al [42]       |
| 24 | <i>Valumugil seheli</i>     | 1.09 | 0.22 | 0.35 | 0.70 | 0.009 | 0.018 | 2.46 | 4.92 | 0.001 | 0.002 | Agusa et al [55]         |
|    |                             | 1.24 | 0.25 | 0.40 | 0.80 | 0.010 | 0.020 | 2.80 | 5.60 | 0.001 | 0.003 | Agusa et al [55]         |
|    |                             | 1.36 | 0.27 | 0.44 | 0.88 | 0.011 | 0.022 | 3.07 | 6.14 | 0.001 | 0.003 | Agusa et al [55]         |
|    |                             | 1.09 | 0.22 | 0.35 | 0.70 | 0.009 | 0.018 | 2.46 | 4.92 | 0.001 | 0.002 | Agusa et al [55]         |
|    |                             | 1.88 | 0.38 | 0.61 | 1.21 | 0.015 | 0.030 | 4.25 | 8.49 | 0.002 | 0.004 | Agusa et al [55]         |
|    |                             | 1.68 | 0.34 | 0.54 | 1.08 | 0.014 | 0.027 | 3.79 | 7.59 | 0.002 | 0.003 | Agusa et al [55]         |
|    |                             | 2.03 | 0.41 | 0.65 | 1.31 | 0.016 | 0.033 | 4.58 | 9.17 | 0.002 | 0.004 | Agusa et al [55]         |
|    |                             | 1.14 | 0.23 | 0.37 | 0.74 | 0.009 | 0.018 | 2.57 | 5.15 | 0.001 | 0.002 | Agusa et al [55]         |
|    |                             | 1.44 | 0.29 | 0.46 | 0.93 | 0.012 | 0.023 | 3.25 | 6.5  | 0.001 | 0.003 | Agusa et al [55]         |
|    |                             | 1.48 | 0.30 | 0.48 | 0.95 | 0.012 | 0.024 | 3.34 | 6.68 | 0.002 | 0.003 | Agusa et al [55]         |
|    |                             | 1.15 | 0.23 | 0.37 | 0.74 | 0.009 | 0.019 | 2.60 | 5.19 | 0.001 | 0.002 | Agusa et al [55]         |
|    |                             | 2.90 | 0.58 | 0.94 | 1.87 | 0.023 | 0.047 | 6.55 | 13.1 | 0.003 | 0.006 | Krishnamurti & Nair [45] |

Note: DW= dry weight basis; WW= wet weight basis; High= two times consumption of the normal consumption rate.

Table S5: Values of high estimated daily intake (EDI) (mg/kg bw), high target hazard quotient (THQ), and high estimated weekly intake (EWI) (mg/kg bw) to provisional tolerable weekly intake (PTWI) and high PTWI of Cu in selected fish species from the present study.

| Species                            |        | High<br>EDI | High<br>THQ | High<br>EWI | PTWI%   | High<br>PTWI % |
|------------------------------------|--------|-------------|-------------|-------------|---------|----------------|
| <i>Drepana punctata</i>            | Muscle | 1.050       | 0.026       | 7.348       | 0.00169 | 0.00339        |
|                                    | Skin   | 1.186       | 0.030       | 8.301       | 0.00191 | 0.00383        |
| <i>Elagatis bipinnulata</i>        | Muscle | 1.659       | 0.041       | 11.616      | 0.00268 | 0.00535        |
|                                    | Skin   | 2.116       | 0.053       | 14.809      | 0.00341 | 0.00682        |
| <i>Selar crumenophthalmus</i>      | Muscle | 2.495       | 0.062       | 17.468      | 0.00402 | 0.00805        |
|                                    | Skin   | 8.604       | 0.215       | 60.228      | 0.01388 | 0.02775        |
| <i>Eleutheronema tetradactylum</i> | Muscle | 2.485       | 0.062       | 17.398      | 0.00401 | 0.00802        |
|                                    | Skin   | 1.233       | 0.031       | 8.634       | 0.00199 | 0.00398        |
| <i>Pomadasys kakaan</i>            | Muscle | 2.405       | 0.060       | 16.833      | 0.00388 | 0.00776        |
|                                    | Skin   | 3.192       | 0.080       | 22.346      | 0.00515 | 0.01030        |
| <i>Megalaspis cordyla</i>          | Muscle | 3.065       | 0.077       | 21.452      | 0.00494 | 0.00989        |
|                                    | Skin   | 5.045       | 0.126       | 35.316      | 0.00814 | 0.01627        |
| <i>Trichiurus lepturus</i>         | Muscle | 5.750       | 0.144       | 40.252      | 0.00927 | 0.01855        |
|                                    | Skin   | 5.691       | 0.142       | 39.834      | 0.00918 | 0.01836        |
| <i>Siganus javus</i>               | Muscle | 10.680      | 0.267       | 74.762      | 0.01723 | 0.03445        |
|                                    | Skin   | 8.874       | 0.222       | 62.117      | 0.01431 | 0.02863        |
| <i>Lates calcarifer</i>            | Muscle | 0.556       | 0.014       | 3.890       | 0.00090 | 0.00179        |
|                                    | Skin   | 3.511       | 0.088       | 24.577      | 0.00566 | 0.01133        |
| <i>Leptomelanosoma indicum</i>     | Muscle | 3.399       | 0.085       | 23.791      | 0.00548 | 0.01096        |
|                                    | Skin   | 2.643       | 0.066       | 18.504      | 0.00426 | 0.00853        |
| <i>Scomberoides lysan</i>          | Muscle | 3.819       | 0.095       | 26.735      | 0.00616 | 0.01232        |
|                                    | Skin   | 4.052       | 0.101       | 28.361      | 0.00653 | 0.01307        |
| <i>Tenualosa toli</i>              | Muscle | 1.432       | 0.036       | 10.026      | 0.00231 | 0.00462        |
|                                    | Skin   | 1.748       | 0.044       | 12.239      | 0.00282 | 0.00564        |

Note: \*Highlighted value indicates species with High THQ >1; High= two times consumption of the normal consumption rate.
